# Supplementary material
Source: Springer Nature journal article supplement (https://www.springermedizin.de/resource/supplementary/12931_2012_1287_MOESM4_ESM.pdf/9425708)

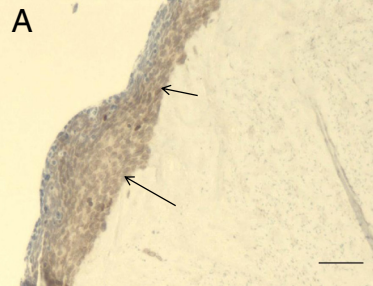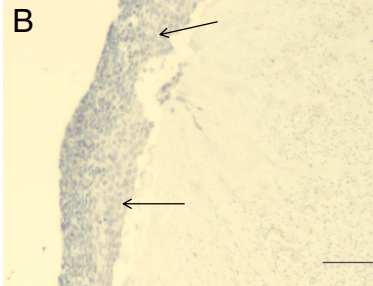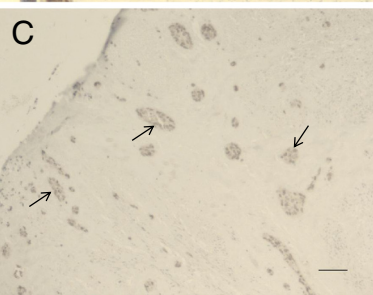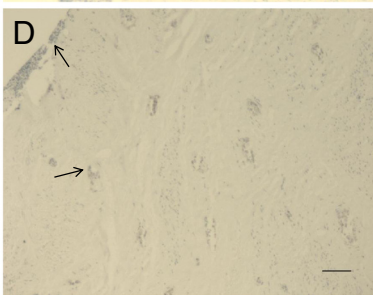

Supplement: MOESM4 [file 9425708]
